# Supplementary material
Source: Frontiers journal article supplement (https://www.frontiersin.org/articles/538518)
Supplement: Data_Sheet_1.XLSX [file Data_Sheet_1.XLSX]

## Sheet: Tabelle1
ID	LAB_ID	Lat	Long	Altitude*1	TJJA*2	MAT*2	PJJA*2	MAP*2	AI*3	ET*3	ẟ2Hp-OIPC*4	±*4	ẟ18Op-OIPC*4	±*4	ẟ2Hp-WM*4	ẟ18Op-WM*4	ẟ2Hn-C29	ẟ2Hn-C29 ±	ẟ2Hn-C31	ẟ2Hn-C31 ±	ẟ18Oara	ẟ18Oara ±	Ɛ2H n-C29/p	Ɛ2H n-C31/p	Ɛ18O ara/p
1	TLC15	48.76	97.25	1895	12.4	-6.1	144.6	216.2	0.28	780.5	-99	7	-13.3	0.8	-78.6	-10.8	-200.4	0.6	-211.1	0.3	30	0.6	-132.2	-143.8	41.3
2	TLC14	48.75	97.22	1952	12.3	-6.3	147.5	220.4	0.28	778.8	-100	8	-13.5	0.8	-78.9	-10.9	-189.9	1.1	-212.5	0.7	n.e.	n.e.	-120.5	-145.1	n.e.
3	TLC13	48.77	97.30	1859	12.5	-5.9	143.3	214.3	0.27	782.5	-99	7	-13.3	0.8	-78.5	-10.8	-184.9	0.9	-195.7	1.3	n.e.	n.e.	-115.4	-127.1	n.e.
4	TLC12	48.78	97.33	1799	12.4	-5.6	141.6	211.9	0.27	778.8	-98	7	-13.1	0.8	-78.2	-10.8	-190.7	1.4	-207.9	0.8	n.e.	n.e.	-122.1	-140.7	n.e.
5	TLC11	48.79	97.34	1814	12.2	-5.7	141.7	212.4	0.27	773.1	-98	7	-13.2	0.8	-77.9	-10.7	-193.5	2.5	-225.4	0.7	n.s.	n.s.	-125.4	-160	n.s.
6	TLC10	48.79	97.33	1797	12.2	-5.6	141.8	212.5	0.27	772.2	-98	7	-13.1	0.8	-78	-10.8	-195.8	0.6	-213.4	1.1	n.s.	n.s.	-127.8	-146.8	n.s.
7	TLC9	48.79	97.33	1811	12.0	-5.6	141.7	211.9	0.28	765.9	-98	7	-13.2	0.8	-77.6	-10.7	-184.2	1.7	-202.5	0.6	28.8	0.1	-115.5	-135.4	39.9
8	TLC8	48.80	97.38	1808	12.1	-5.7	142.7	211.9	0.28	767.6	-98	7	-13.1	0.8	-77.2	-10.6	-189	1	-213.4	0.6	n.s.	n.s.	-121.2	-147.6	n.s.
9	TLC7	48.80	97.37	1852	12.0	-5.7	142.5	211.6	0.28	767.5	-99	7	-13.3	0.8	-78	-10.7	-183	3	-206.2	1.7	29.3	0.5	-113.9	-139.1	40.5
10	TLC6	48.80	97.35	1841	12.0	-5.6	142.0	210.8	0.28	765.2	-99	7	-13.2	0.8	-77.9	-10.7	-175.1	1.6	-198.1	1.5	n.s.	n.s.	-105.4	-130.4	n.s.
11	TLC5	48.79	97.34	1802	12.1	-5.6	141.7	212.1	0.28	768.6	-98	7	-13.2	0.8	-77.6	-10.7	-190.7	1.1	-199.2	2.6	n.s.	n.s.	-122.6	-131.8	n.s.
12	TLC4	48.76	97.30	1942	12.3	-6.4	146.1	217.8	0.28	780.1	-100	8	-13.4	0.8	-78.9	-10.9	-166.5	1.1	-171	1.2	n.s.	n.s.	-95.2	-100.1	n.s.
13	TLC3	48.79	97.30	1797	12.1	-5.5	142.3	213.2	0.28	767.8	-98	7	-13.1	0.8	-78	-10.8	-190.9	0.9	-189.6	2.9	n.s.	n.s.	-122.5	-121	n.s.
14	TLC2	48.79	97.30	1792	12.1	-5.5	142.5	213.2	0.28	766.4	-98	7	-13.1	0.8	-77.9	-10.7	-189	0.6	-215.9	0.9	n.s.	n.s.	-120.5	-149.7	n.s.
15	TLC1	48.79	97.30	1796	12.1	-5.5	142.6	213.6	0.28	766.7	-98	7	-13.1	0.8	-77.9	-10.7	-193.7	3.6	-227.6	0.4	n.s.	n.s.	-125.6	-162.3	n.s.
16	T11	48.42	98.90	1948	12.4	-3.5	157.5	221.9	0.27	820.8	-93	6	-12.6	0.7	-73.7	-10.1	-203.6	0.8	-216.8	0.8	28.4	0.3	-140.3	-154.4	38.9
17	T10	48.35	98.92	2133	10.0	-5.1	167.0	238.2	0.32	730.4	-95	6	-12.8	0.7	-75.2	-10.3	-200.9	1.4	-210.7	0.4	28.9	0	-135.9	-146.4	39.6
18	T9	48.33	98.91	2198	9.5	-5.7	171.6	251.9	0.36	695.2	-95	6	-12.8	0.7	-75.5	-10.4	n.e.	n.e.	n.e.	n.e.	31.4	0.3	n.e.	n.e.	42.2
19	T8	48.31	98.92	2260	9.0	-6.2	172.3	252.5	0.37	674.0	-97	7	-13.1	0.7	-76.8	-10.6	n.e.	n.e.	-200.8	1.2	30.3	0.6	n.e.	-134.4	41.3
20	T7b	48.31	98.92	2343	8.7	-6.5	172.5	252.9	0.38	658.9	-98	7	-13.2	0.8	-77.5	-10.7	-199.8	0.7	-212.1	1.1	31.5	0.2	-132.5	-145.9	42.6
21	T7a	48.31	98.92	2343	8.7	-6.5	172.5	252.9	0.38	658.9	-98	7	-13.2	0.8	-77.5	-10.7	-195.8	0.9	-208	0.4	31.5	0.2	-128.2	-141.4	42.6
22	T6	48.30	98.94	2441	8.0	-7.1	174.9	254.3	0.4	631.3	-99	7	-13.4	0.8	-78.3	-10.8	-205	1.4	-222.6	0.9	30.8	0.3	-137.5	-156.5	42.1
23	T5	48.29	98.95	2528	7.7	-7.3	176.7	257.1	0.41	620.3	-101	7	-13.6	0.8	-78.9	-10.9	-201.8	0	-208.7	4.7	31	0.2	-133.4	-140.9	42.4
24	T4	48.28	98.98	2475	8.1	-7.0	174.1	251.8	0.39	640.3	-100	7	-13.5	0.8	-78.2	-10.8	-206.7	1.1	-216.7	1	30.4	0.3	-139.4	-150.3	41.6
25	T3	48.26	98.99	2382	8.6	-6.6	171.2	245.2	0.37	667.2	-98	7	-13.2	0.8	-76.8	-10.6	-203.3	1.3	-215.3	1.8	n.s.	n.s.	-137	-150	n.s.
26	T2	48.25	99.01	2284	9.6	-5.7	168.4	239.7	0.33	714.9	-96	7	-13	0.7	-76.9	-10.6	-214.9	1.2	-224.3	0.6	32.1	0.1	-149.5	-159.6	43.1
27	T1	48.24	99.02	2235	10.5	-5.0	163.5	231.0	0.3	754.3	-95	6	-12.8	0.7	-76.5	-10.5	-199.1	0.4	-217.7	0.3	32.7	0.9	-132.8	-152.9	43.7
28	TSC5	48.15	99.75	2054	12.4	-3.8	165.3	220.7	0.27	814.0	-89	5	-12	0.6	-69.7	-9.6	-203.2	0.8	-214.5	0.3	n.s.	n.s.	-143.5	-155.6	n.s.
29	TSC3	48.15	99.72	2065	12.5	-4.0	165.1	223.6	0.28	804.1	-90	5	-12	0.6	-70	-9.6	-198.3	0.3	-209.8	0.5	28.2	0.2	-138	-150.3	38.2
30	UGC15	47.74	102.74	1366	15.1	-0.8	200.0	275.9	0.28	976.0	-67	2	-8.9	0.2	-56	-7.5	-203.1	0.9	-191.5	1.3	28.5	0.4	-155.8	-143.6	36.2
31	UGC12	47.75	102.77	1337	15.2	-0.6	198.9	276.2	0.28	978.8	-66	2	-8.8	0.2	-55.7	-7.4	-184.7	2.6	-196	1.4	n.s.	n.s.	-136.5	-148.6	n.s.
32	UGC7	47.75	102.80	1343	15.2	-0.5	198.3	273.3	0.28	979.1	-67	2	-8.8	0.2	-54.8	-7.3	-186.1	0.6	-215.9	1.8	n.s.	n.s.	-139	-170.5	n.s.
33	UGC3	47.76	102.81	1333	15.2	-0.5	199.4	273.2	0.28	976.6	-66	2	-8.8	0.2	-54.7	-7.3	-184.7	2.5	-198.7	0.5	n.s.	n.s.	-137.5	-152.4	n.s.
34	P5	47.42	106.77	1611	15.2	-1.7	187.6	256.4	0.26	977.5	-67	1	-9.1	0.2	-56.9	-7.5	-182.3	0.8	-202.1	0.4	32.2	0.1	-132.9	-154	40
35	P6	46.86	106.64	1376	16.7	-0.3	148.5	194.2	0.18	1078.1	-62	3	-8.3	0.2	-51.2	-6.7	-183.2	0.6	-196.5	1.9	32.2	0.4	-139.1	-153.1	39.2
36	P7	45.71	106.12	1406	18.0	1.6	112.1	155.7	0.13	1232.1	-58	5	-7.9	0.5	-52.9	-7	-178.8	1.2	-208.2	0.4	33.9	0.9	-132.9	-164	41.1
37	P9	45.36	105.69	1342	18.9	2.3	90.1	118.1	0.09	1297.4	-56	6	-7.7	0.5	-47.8	-6.3	-204.8	0.6	-201.6	1.2	33.6	0.2	-164.8	-161.5	40.2
38	P12	44.67	105.55	1224	20.4	3.6	73.8	105.2	0.07	1405.7	-53	6	-7.3	0.6	-49.4	-6.7	n.e.	n.e.	-181.5	0.7	33.4	0.6	n.e.	-138.9	40.4
39	P13	44.51	105.35	1314	20.3	3.8	73.0	104.7	0.07	1427.4	-55	5	-7.5	0.6	-49.2	-6.7	-154.1	1.8	-184.3	0.6	33.2	0.4	-110.3	-142.1	40.1
40	P15	44.11	105.05	1358	20.4	4.4	73.4	104.5	0.07	1496.5	-56	4	-7.7	0.4	-48.4	-6.6	-172.7	2.9	-192.8	0.2	35.7	0.3	-130.6	-151.8	42.5
41	P19	43.19	104.87	1453	21.0	5.5	75.0	108.3	0.07	1662.7	-61	5	-8.3	0.4	-48.4	-6.7	-152.2	0.8	-194.3	0.3	35.9	1.2	-109.1	-153.4	42.9
42	P23	43.59	103.04	1443	20.9	4.9	70.7	104.4	0.06	1613.8	-56	5	-7.4	0.4	-46.4	-6.2	-142.6	0.5	-153.9	0.5	30.9	0.9	-101	-112.7	37.4
LEGEND	n.e.	sample not evaluable
	n.s.	sample not analysed for ẟ18Oara
	AW	amount-weighted mean
References	*1	Jarvis, A., Reuter, H.I., Nelson, A. and Guevara, E.: Hole filled seamless SRTM data V4, International Centre for Tropical Agriculture (CIAT), 2008, http://srtm.csi.cigar.org (Accessed January 31)
	*2	Fick, S. E. and Hijmans, R. J.: WorldClim 2: New 1-km spatial resolution climate surfaces for global land areas, Int. J. Climatol., 37, 4302–4315, https://doi.org/10.1002/joc.5086, 2017
	*3	Trabucco, A. and Zomer, R.: Global Aridity Index and Potential Evapotranspiration (ET0) Climate Database v2, https://doi.org/10.6084/M9.FIGSHARE.7504448.V3, 2019
	*4	Bowen, G. J. (2019). The Online Isotopes in Precipitation Calculator, version 3.1., 2020, http://www.waterisotopes.org (Accessed January 31)
